# Supplementary material for: Re-appraisal of the obesity paradox in heart failure: a meta-analysis of individual data
Source: Springer Nature journal article supplement (doi:10.1007/s00392-021-01822-1), 2021-03-11

A

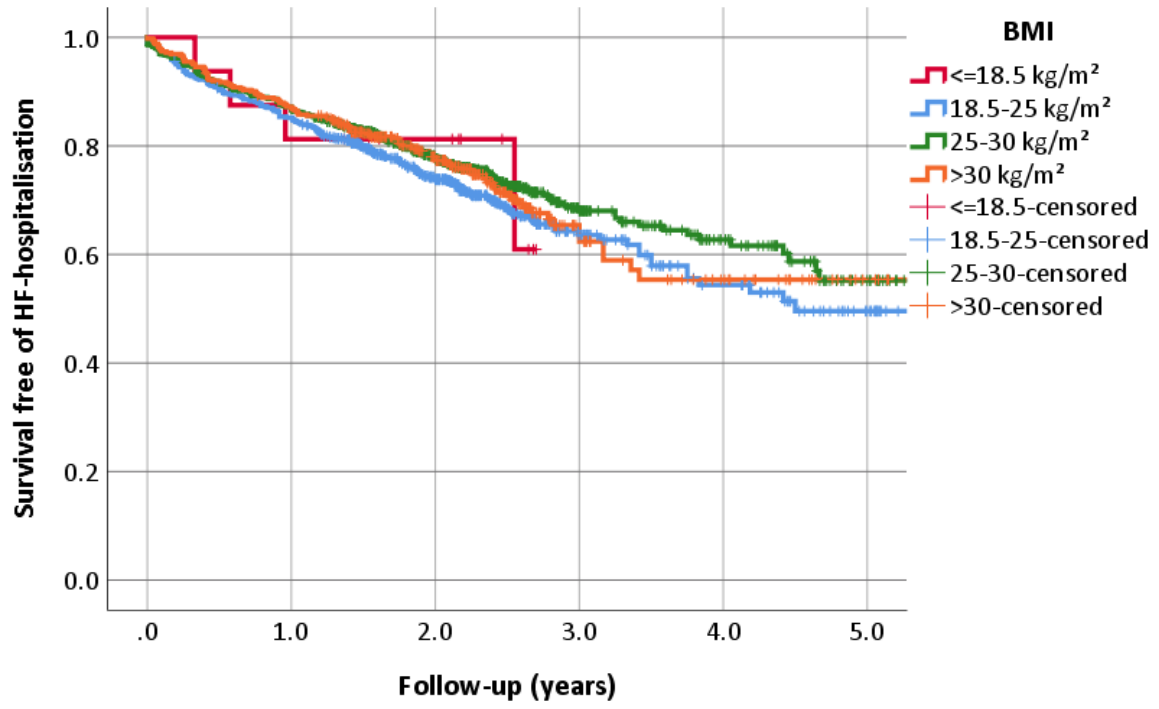

B

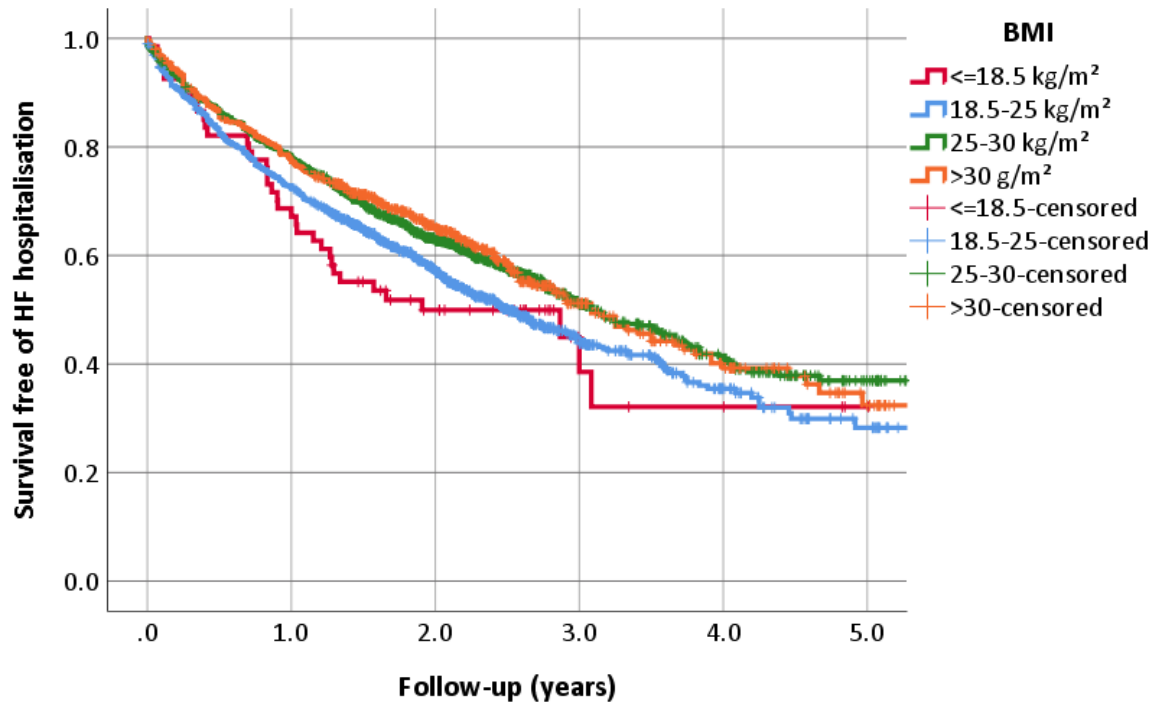

Supplement: MOESM1 [file 18955242]
